# Supplementary material
Source: PubMed Central journal article supplement (PMC4094065)

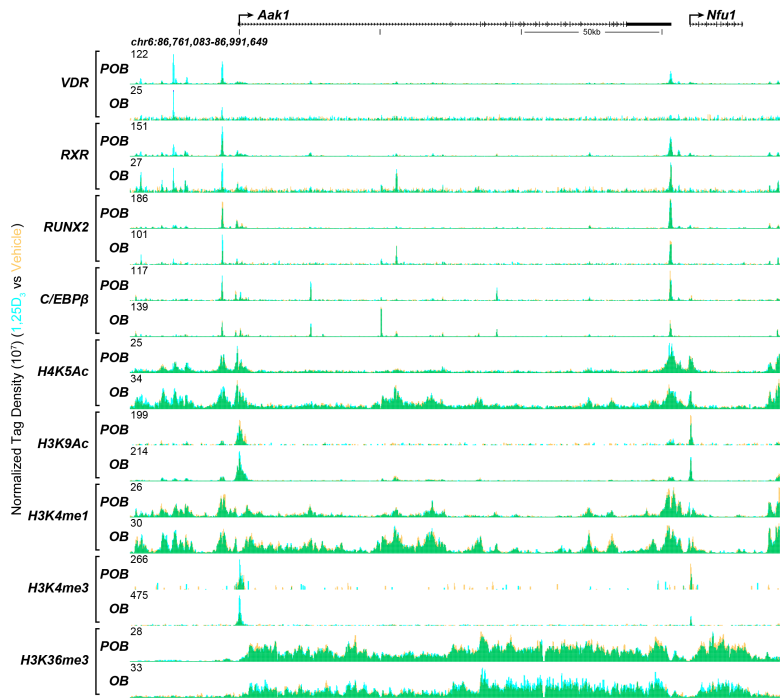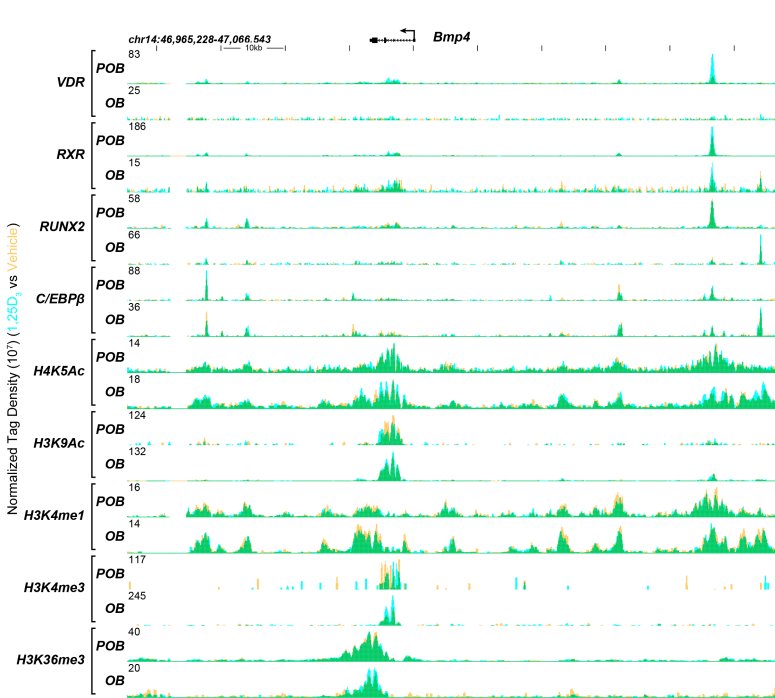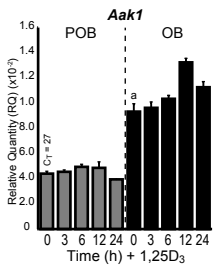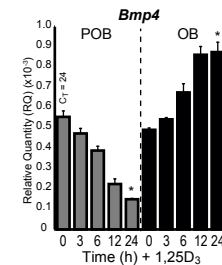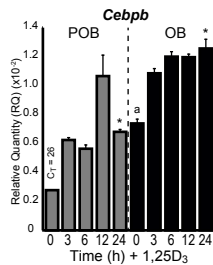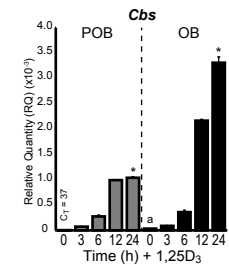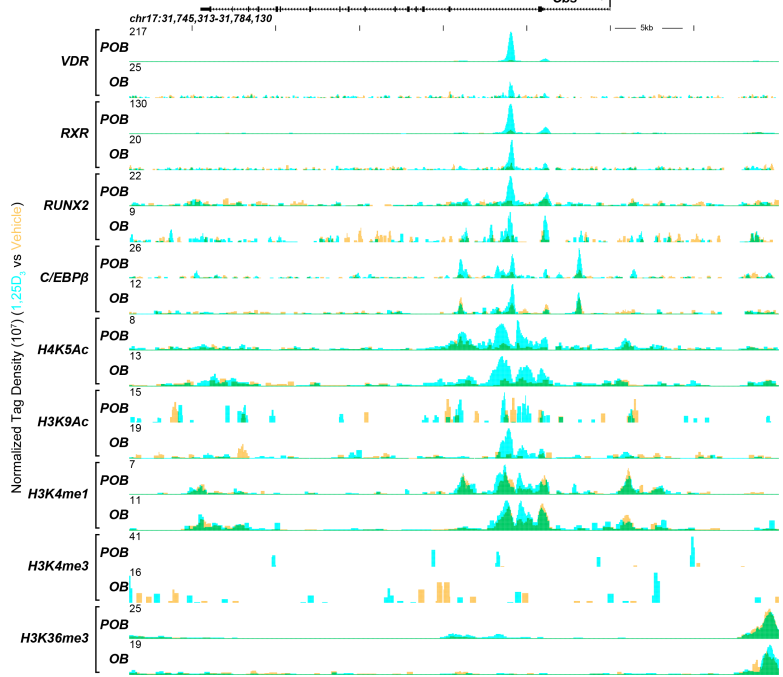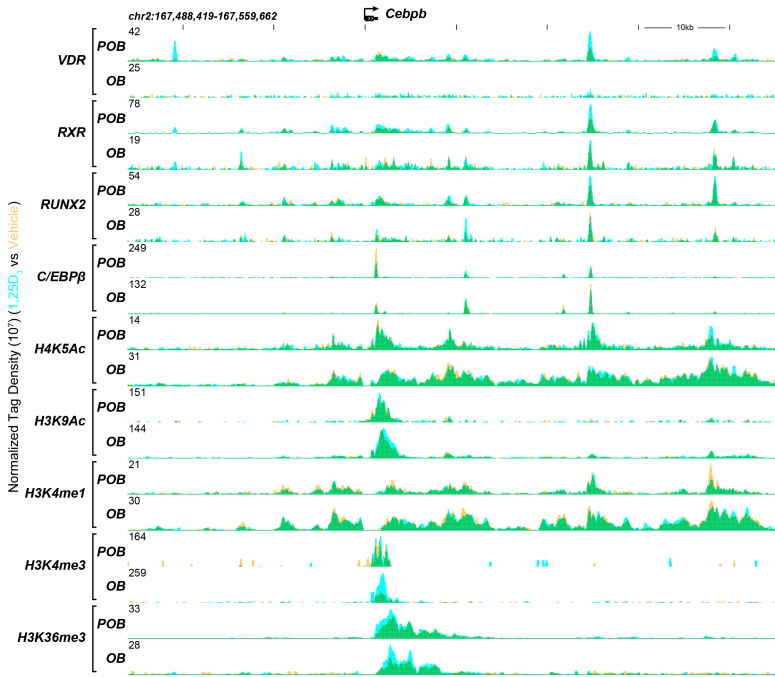

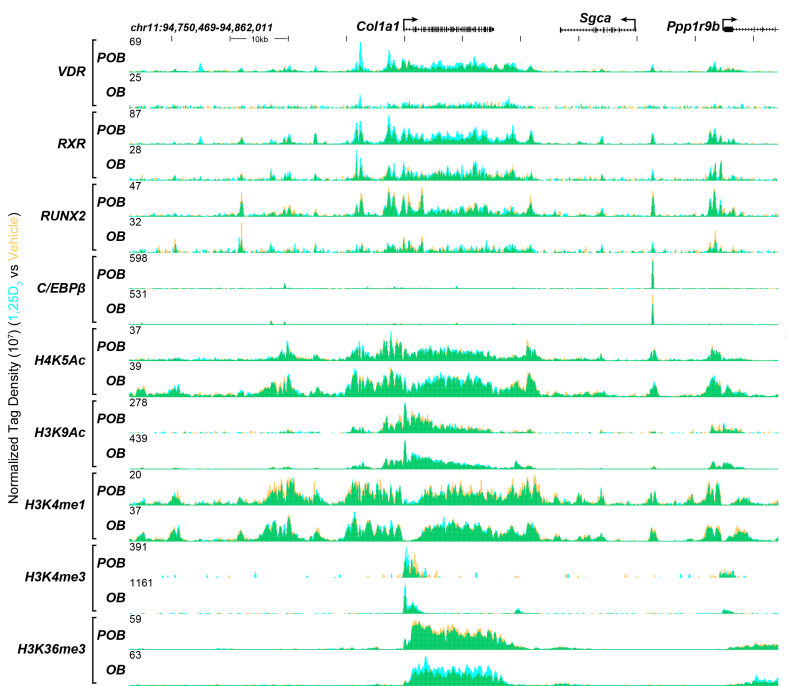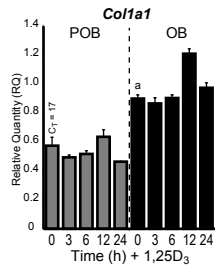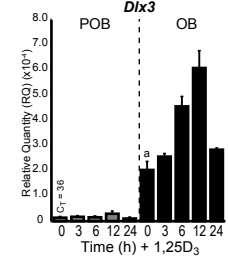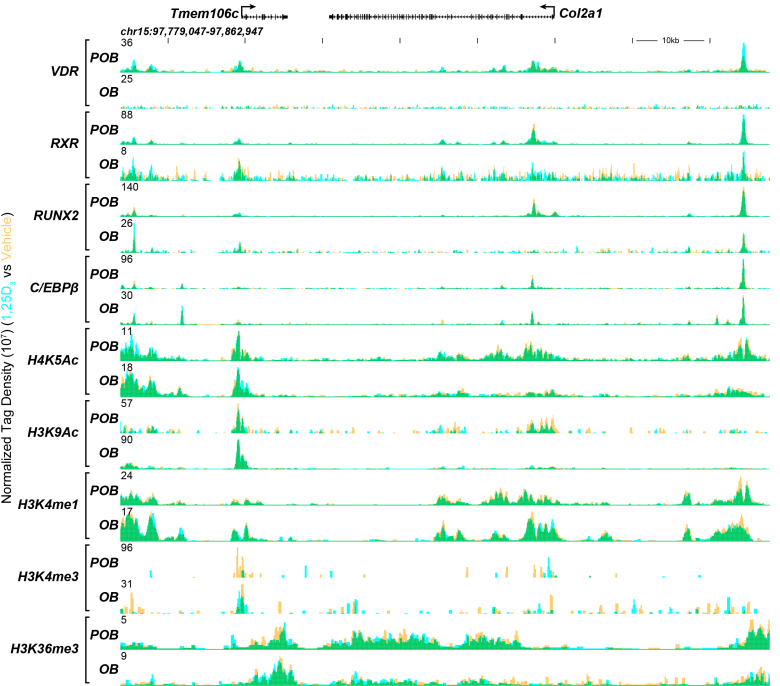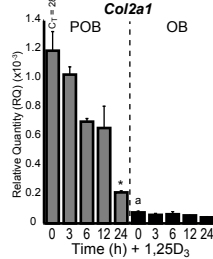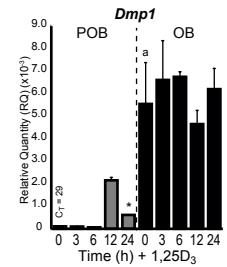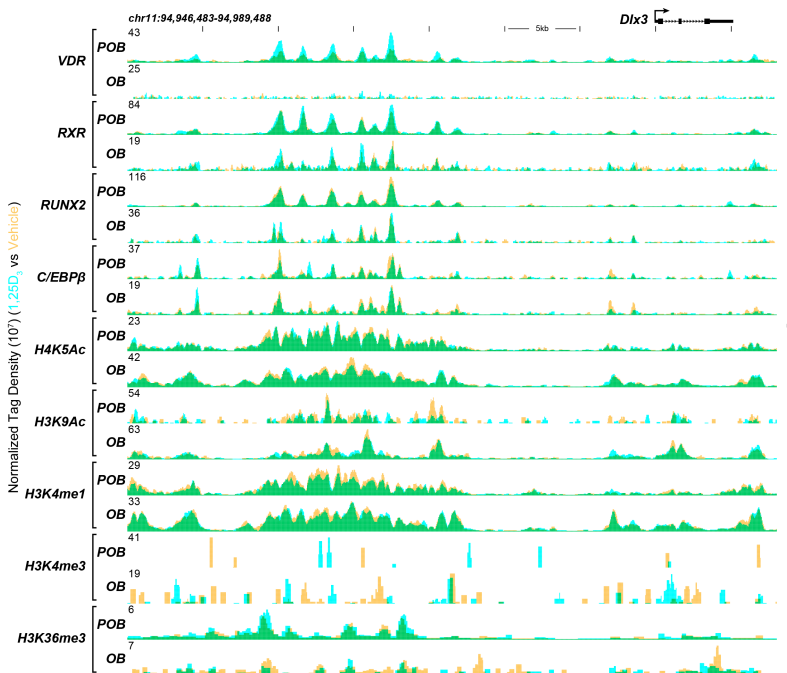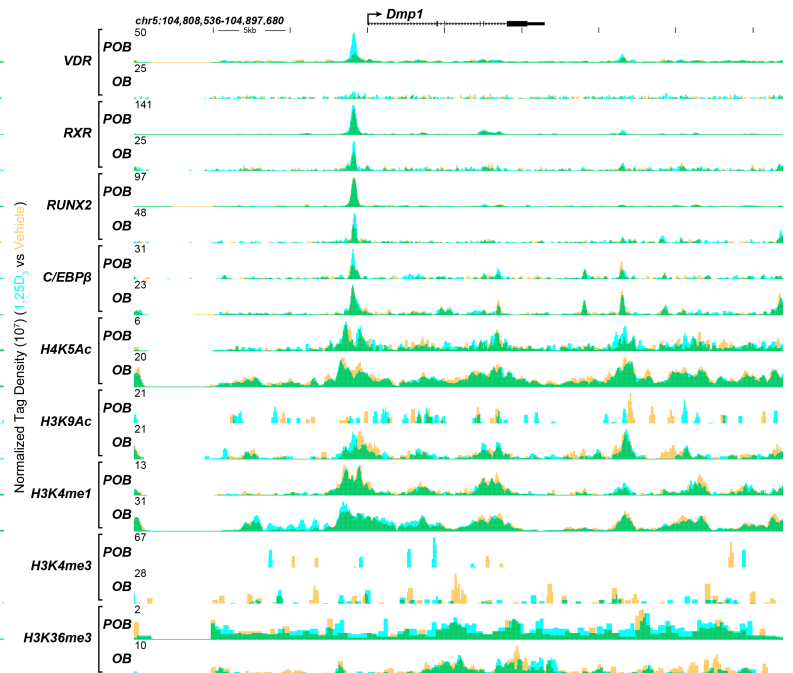

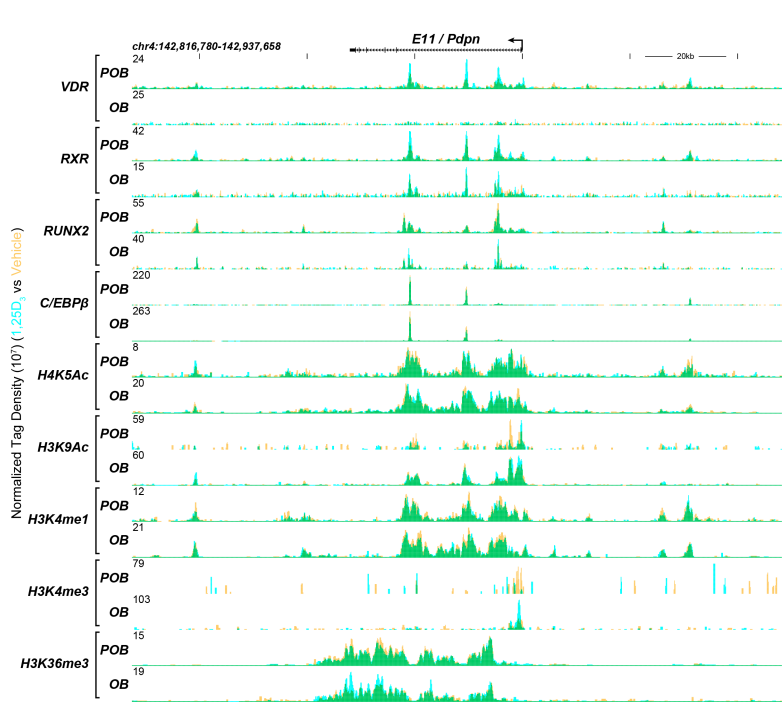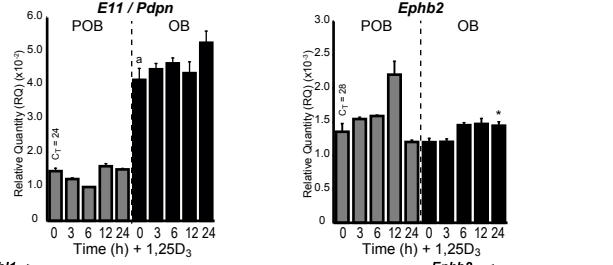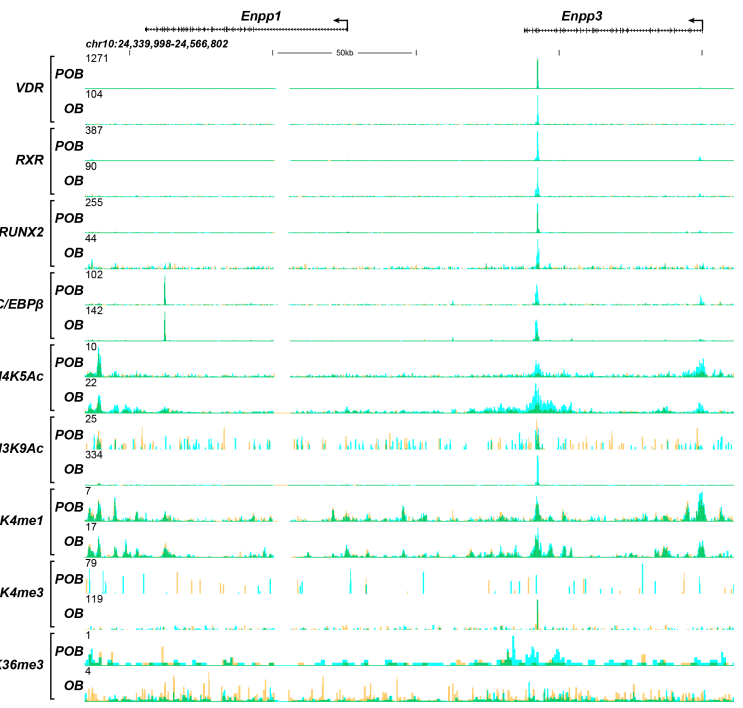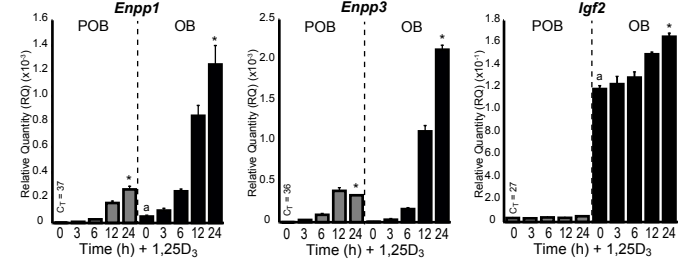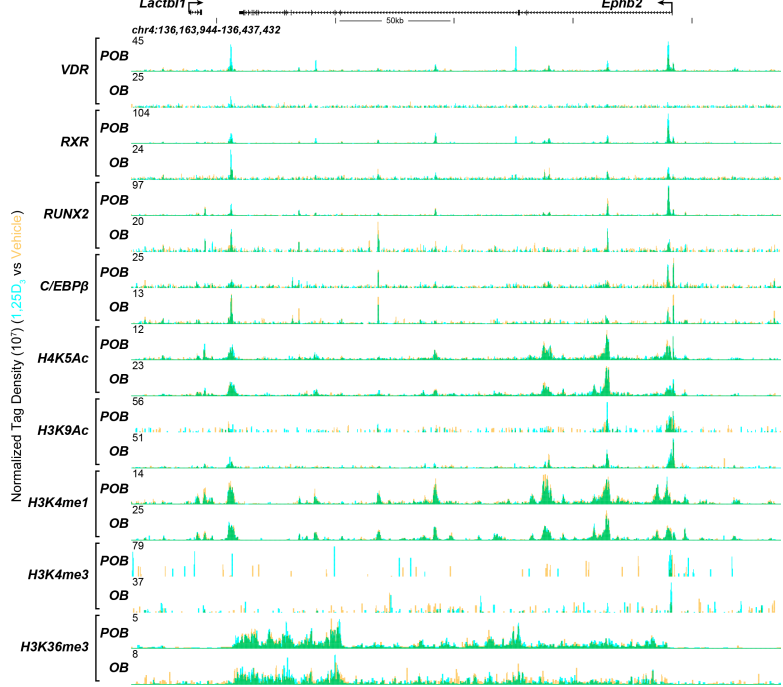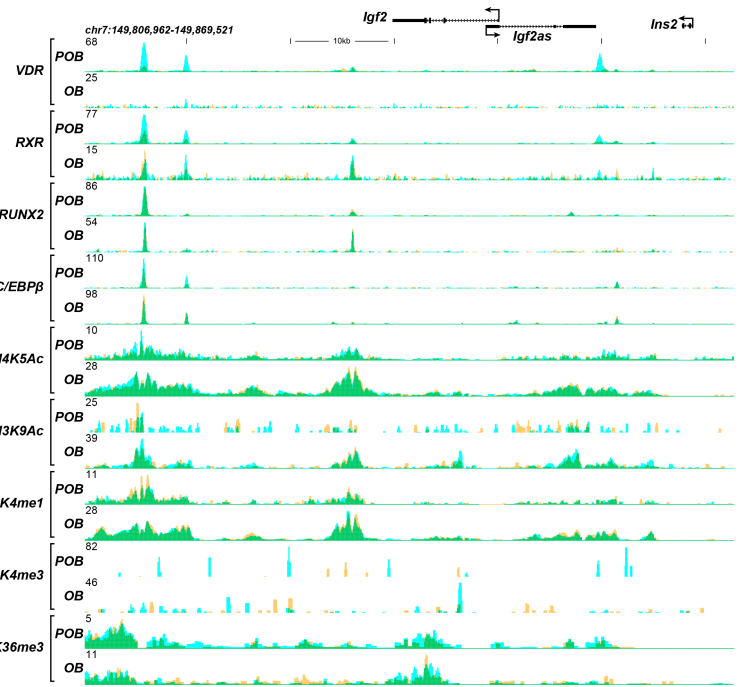

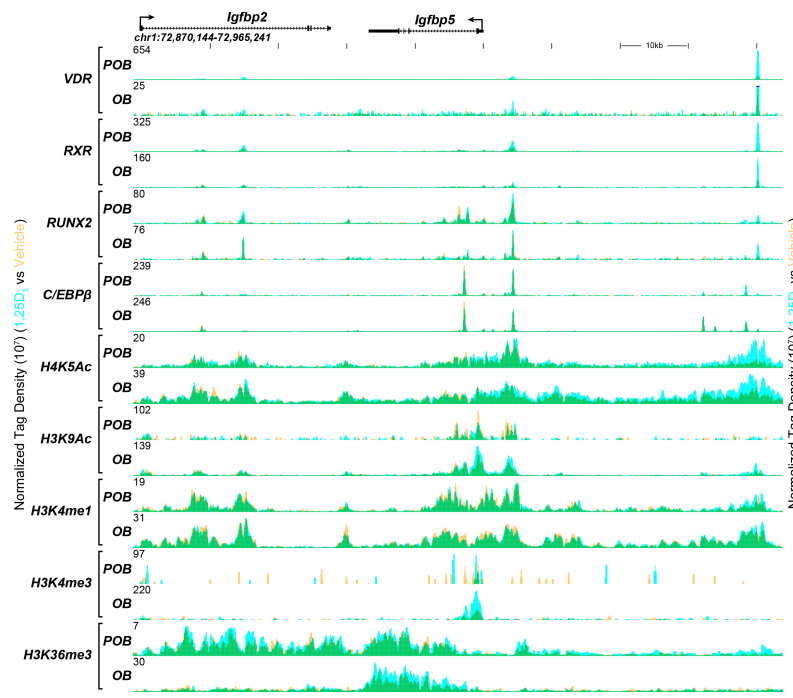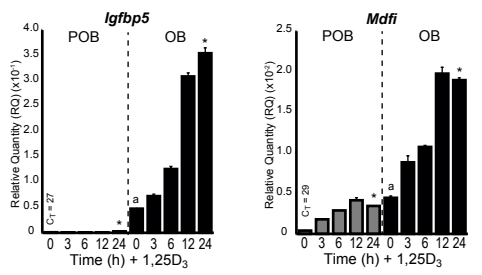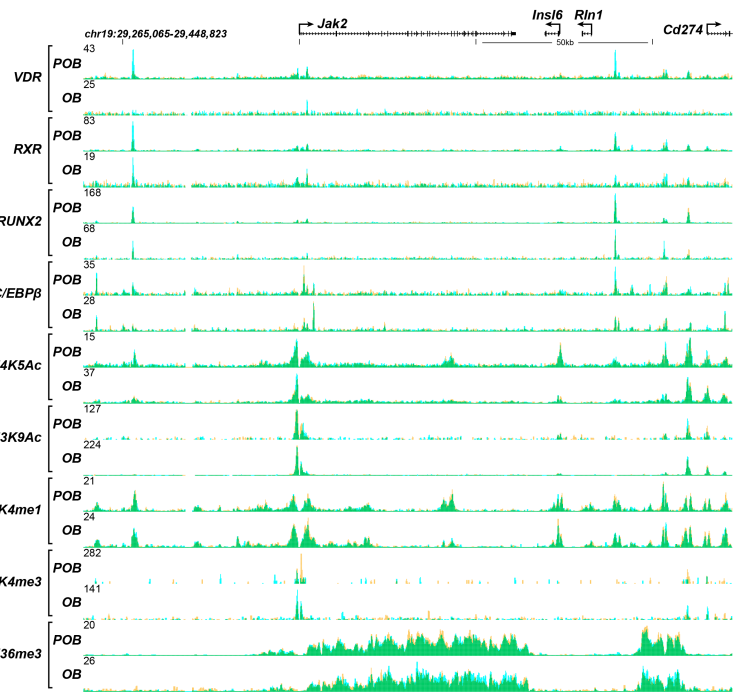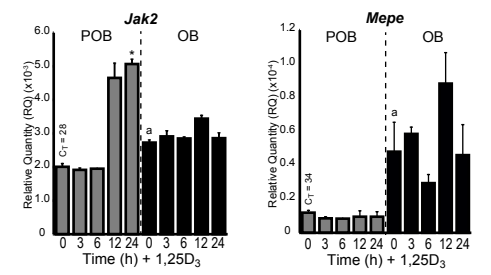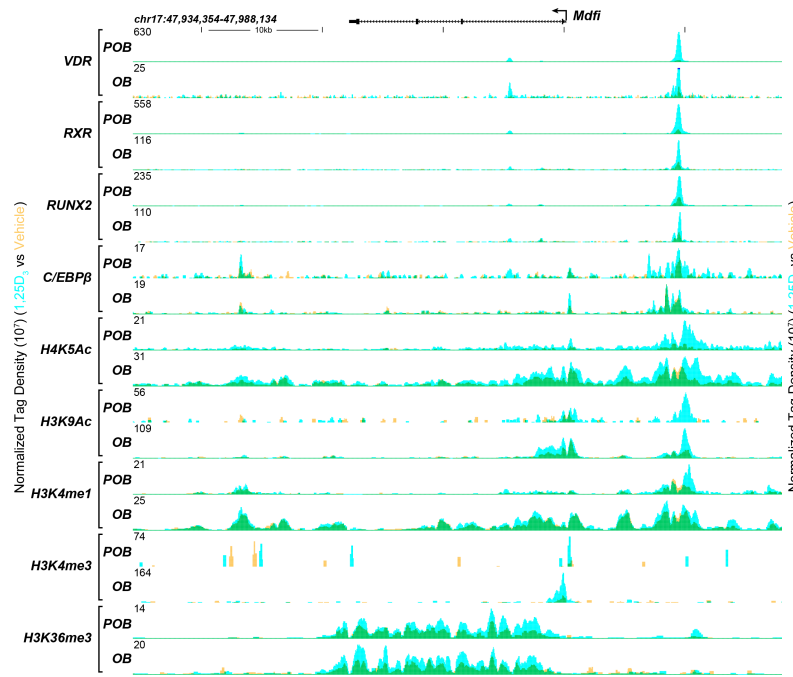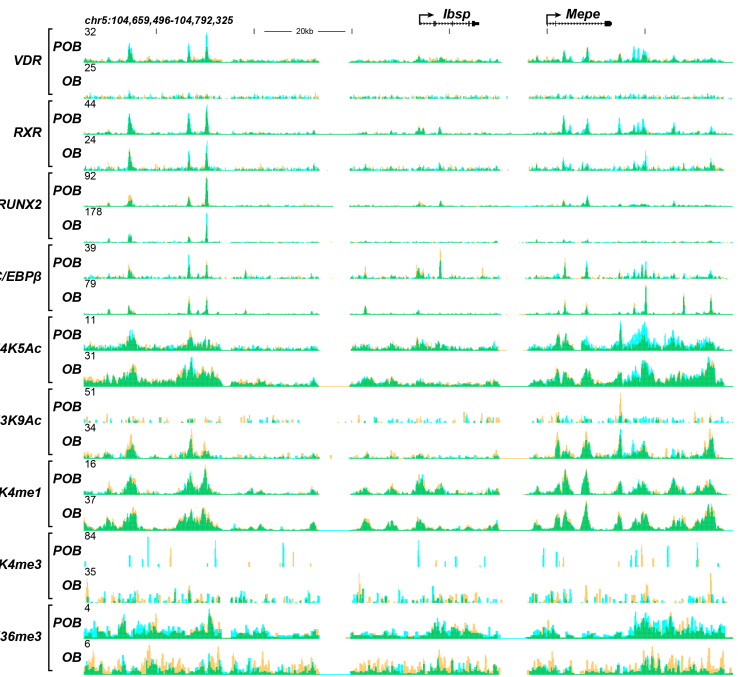



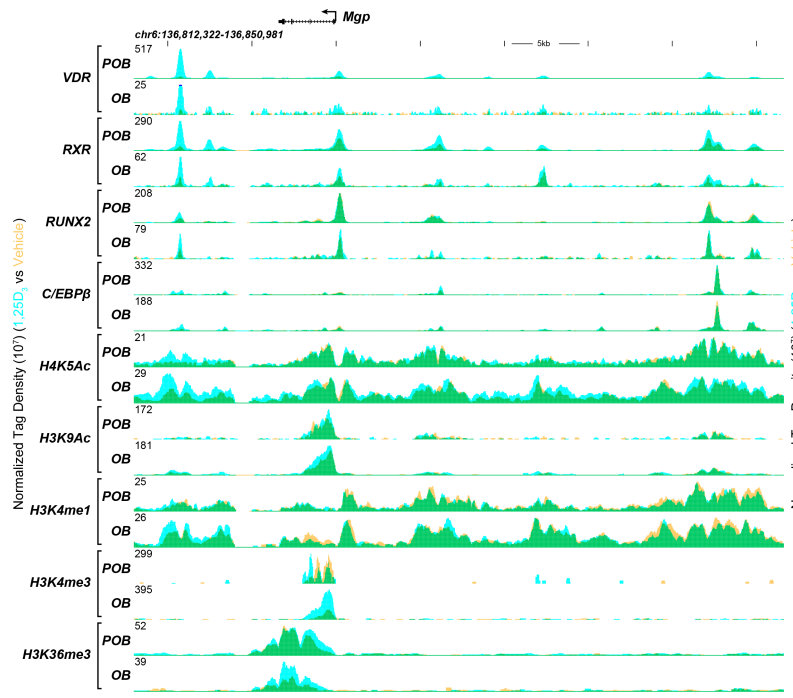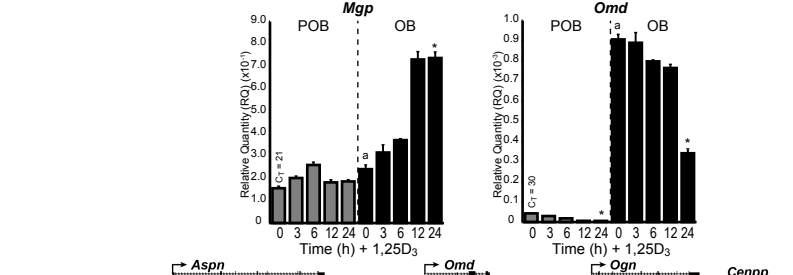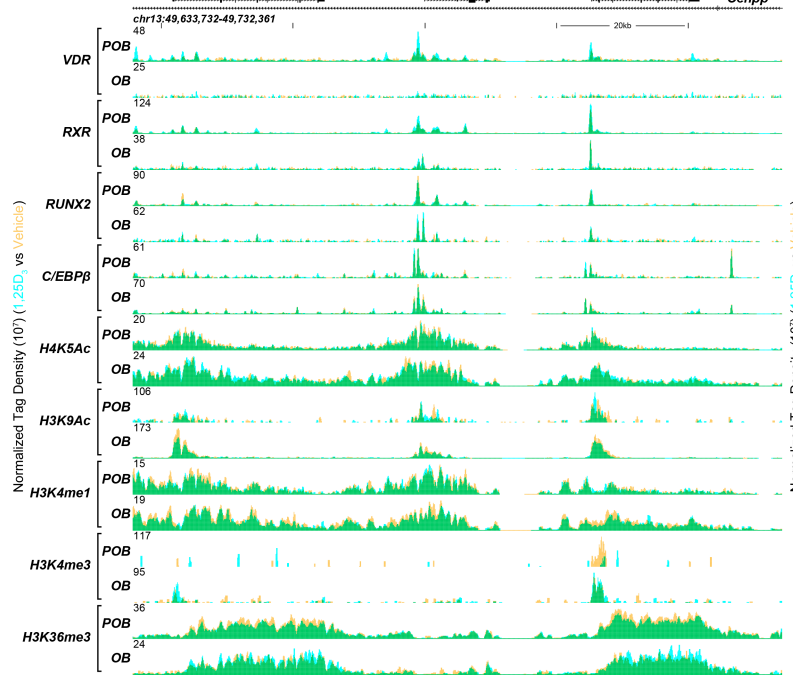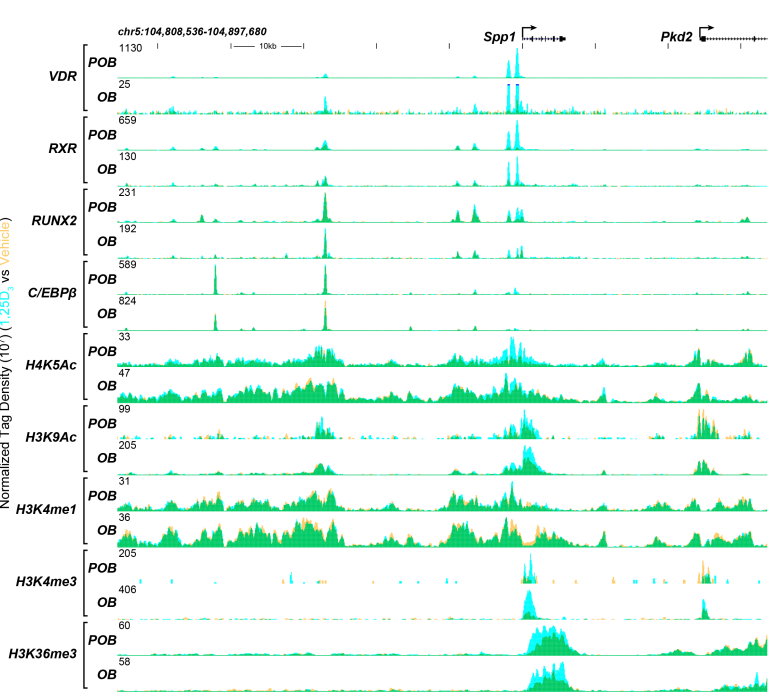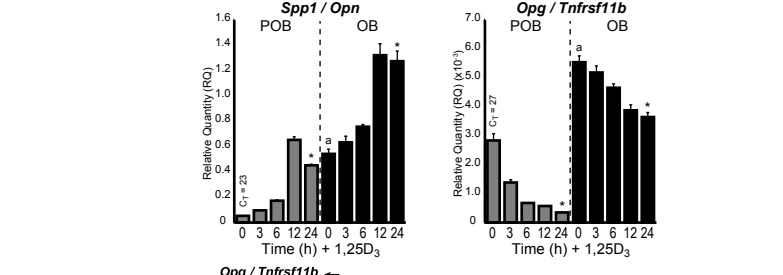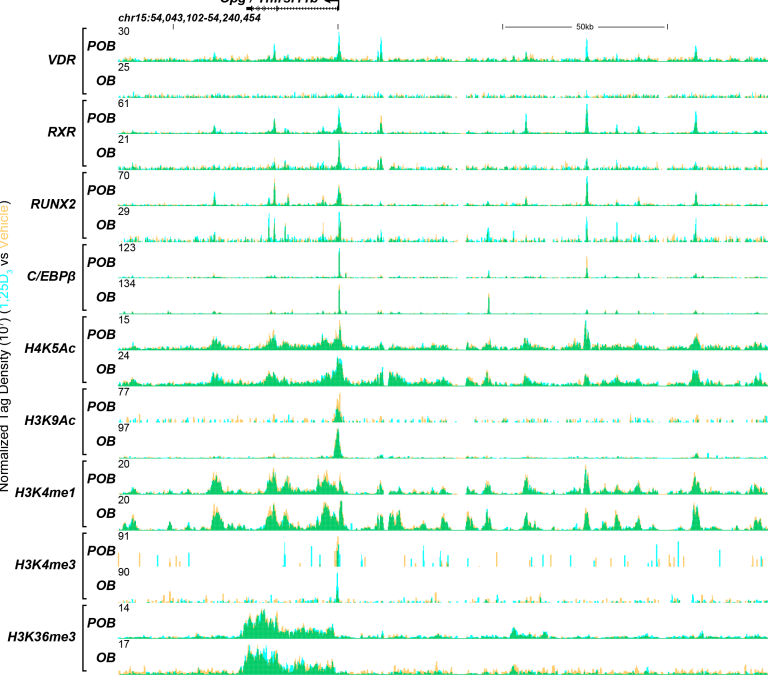

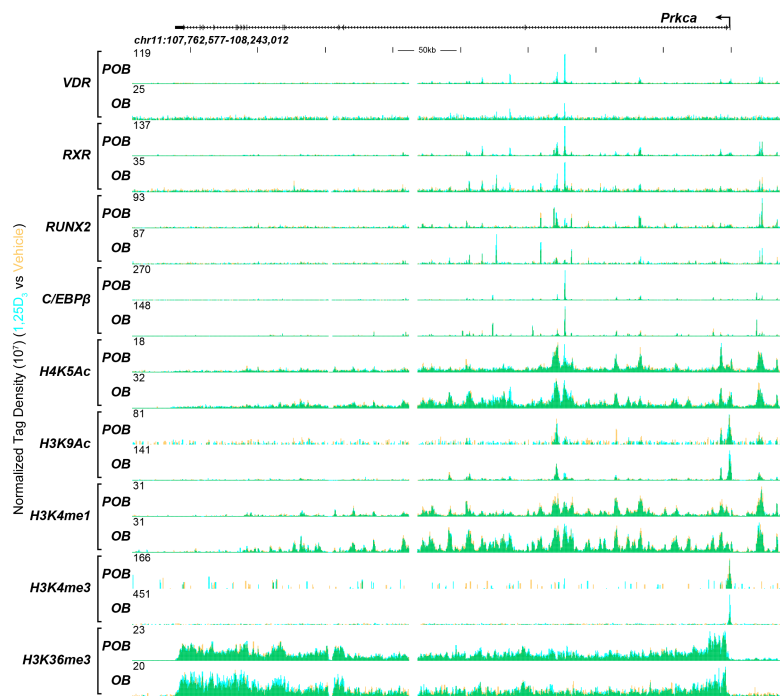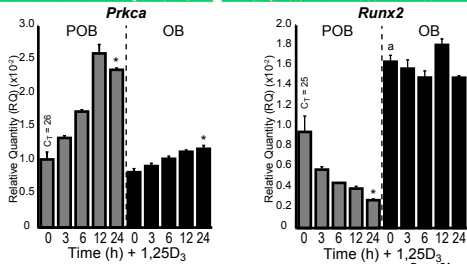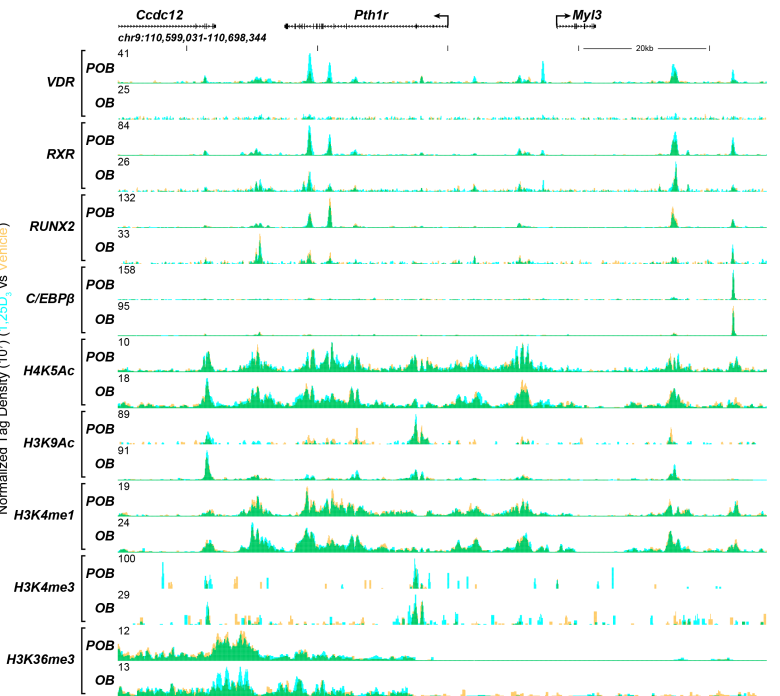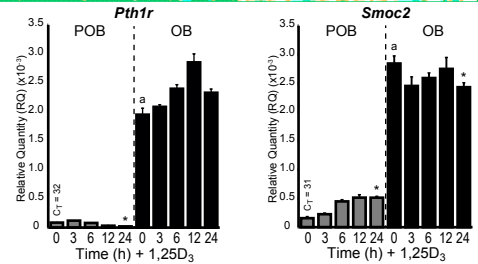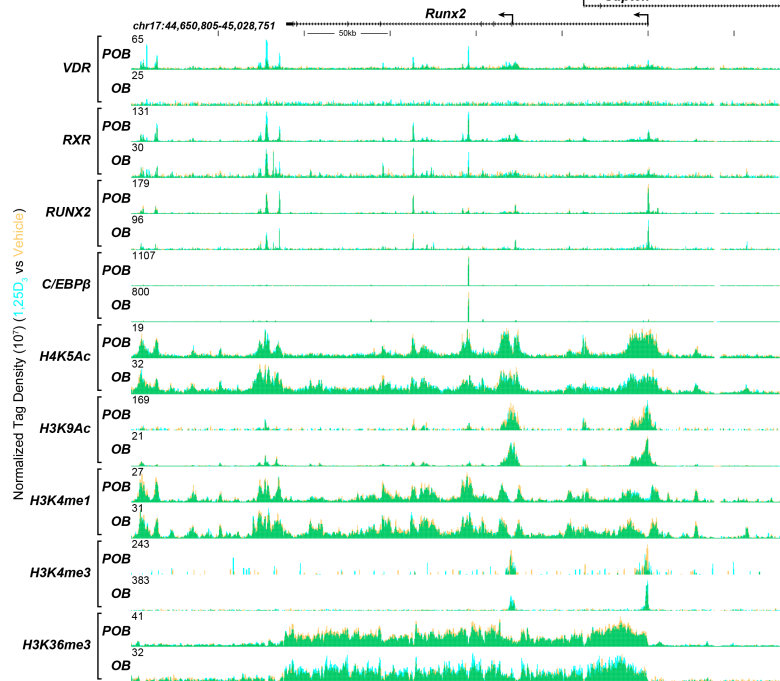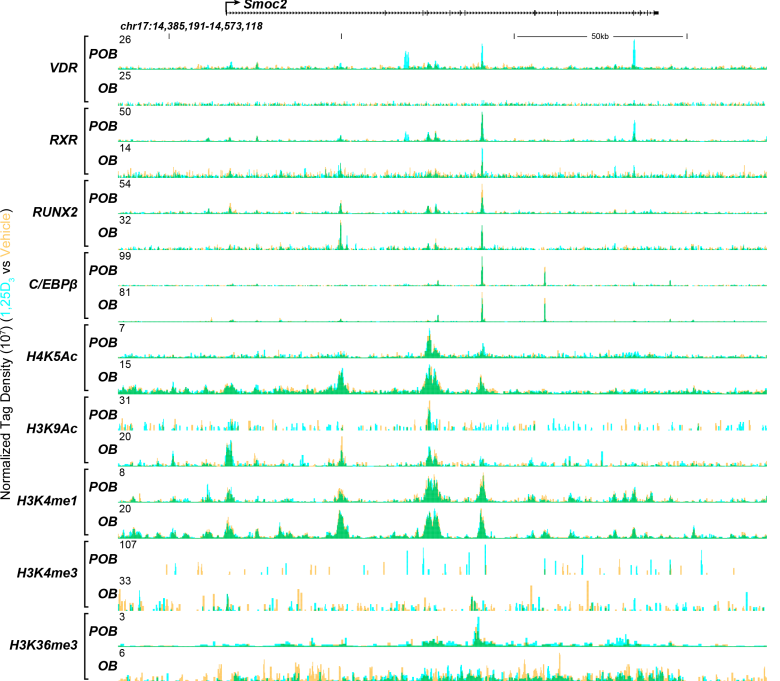

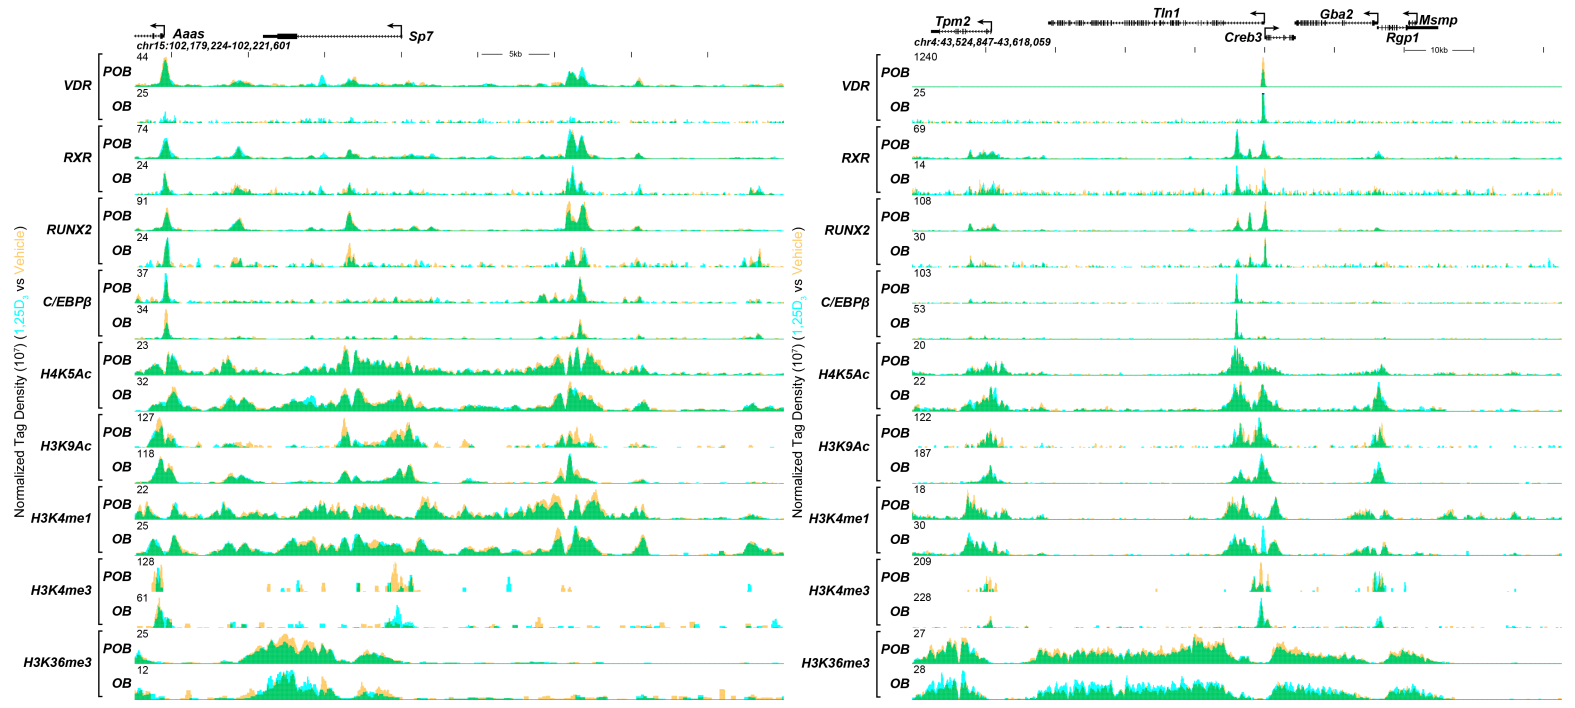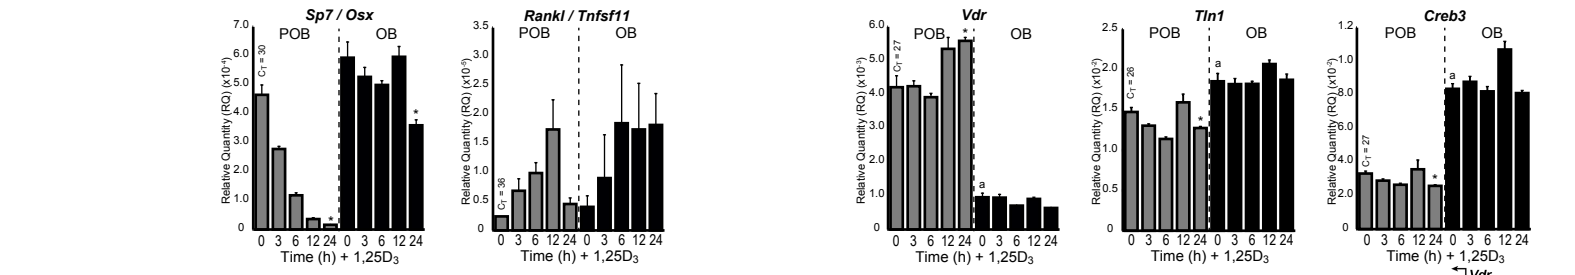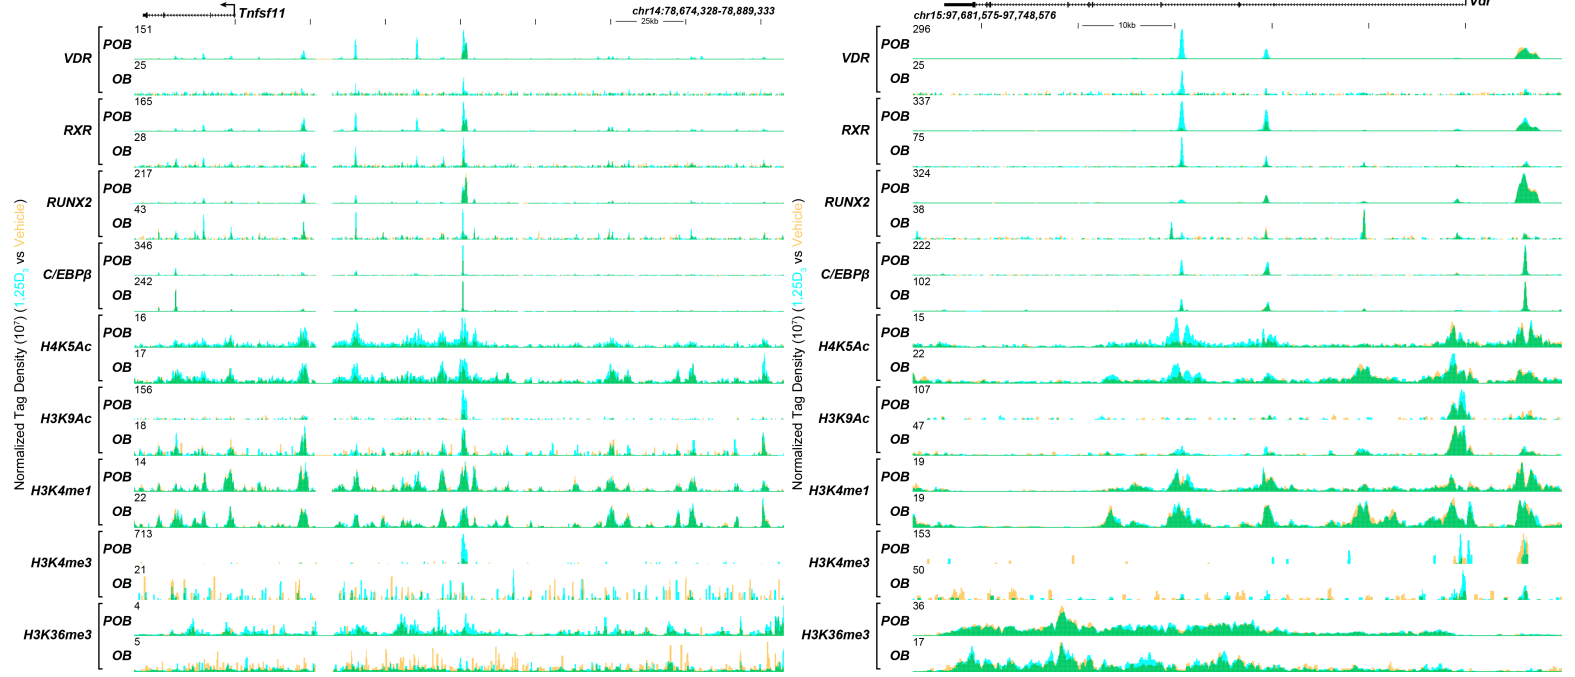

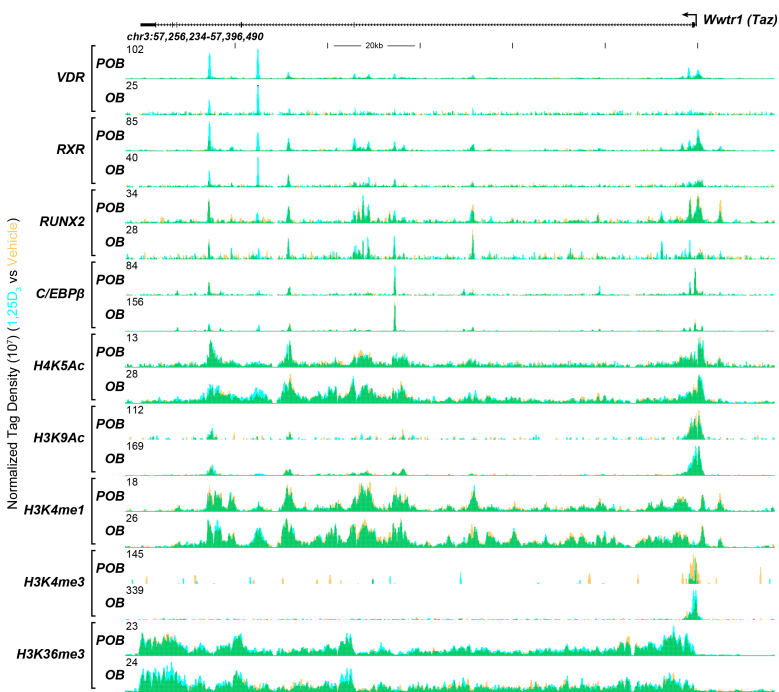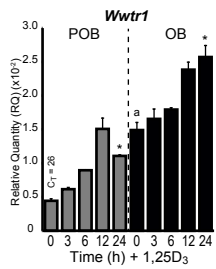

Supplement: supp_M114.578104_jbc.M114.578104-2.pdf [file supp_M114.578104_jbc.M114.578104-2.pdf]
